# Supplementary material
Source: PubMed Central journal article supplement (PMC3278279)
Supplement: NIHMS310134-supplement-1.pdf [file NIHMS310134-supplement-1.pdf]

# SUPPLEMENTARY FIGURES

**Imatinib potentiates anti-tumor T cell responses in gastrointestinal stromal tumor through the inhibition of Ido**

**Vinod P. Balachandran, Michael J. Cavnar, Shan Zeng, Zubin M. Bamboat, Lee M. Ocuin, Hebroon Obaid, Eric C. Sorenson, Rachel Popow, Charlotte Ariyan, Ferdinand Rossi, Peter Besmer, Tianhua Guo, Cristina R. Antonescu, Takahiro Taguchi, Jianda Yuan, Jedd D. Wolchok, James P. Allison, Ronald P. DeMatteo**

**1**

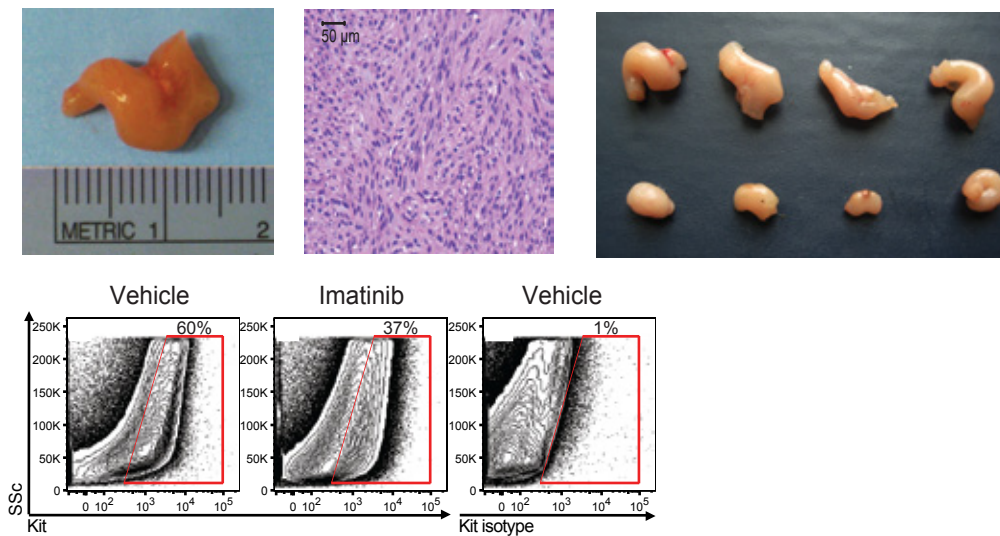

Mouse GIST develops as a discrete nodular mass in the cecum that can be easily resected and weighed (top left panel). Hematoxylin and eosin staining of mouse GIST demonstrates a spindle-shaped morphology of tumor cells that resembles human GIST (top middle panel). Tumors from GIST mice treated with vehicle (top right panel, top row) or imatinib (top right panel, bottom row) for 7 days. Only tumor tissue is shown as the tumors were separated from the intestine. Flow cytometric analysis of tumors after 7 days of treatment with vehicle or imatinib (bottom panel). Numbers indicate the percentage of tumor cells (CD45-Kit<sup>+</sup>) as a frequency of live CD45<sup>-</sup> cells.

**2**

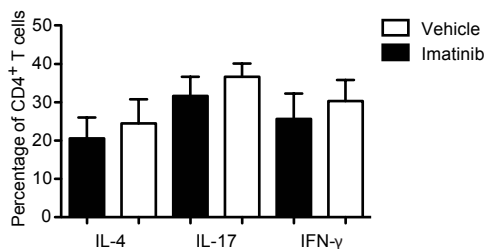

After 7 days of treatment with either vehicle or imatinib, we stimulated intratumoral T cells for 4 hours with phorbol 12-myristate 13-acetate and ionomycin and performed intracellular cytokine analysis for IL-4, IL-17, and IFN-γ production. Data represent means ± s.e.m. and are a composite of 2 experiments, each with 3 mice per group.

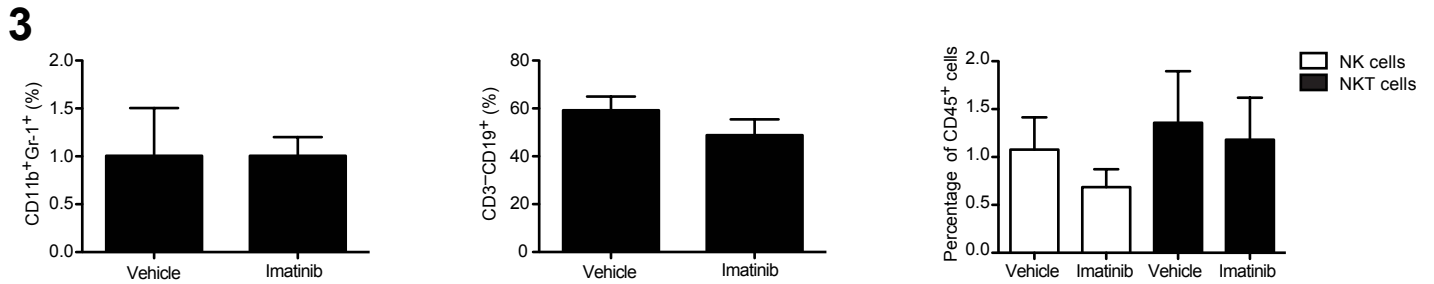

Flow cytometric analysis of tumors after 7 days of treatment with vehicle or imatinib. Myeloid cells were defined as CD11b<sup>+</sup>Gr-1<sup>+</sup>. B cells were defined as CD3-CD19<sup>+</sup>. NK cells were defined as CD3-NK1.1<sup>+</sup>. NKT cells were defined as CD3<sup>+</sup>NK1.1<sup>+</sup>. Numbers indicate frequency of corresponding cells as a percentage of CD45<sup>+</sup> cells. Data represent means ± s.e.m. *n* = 7–8 per group.

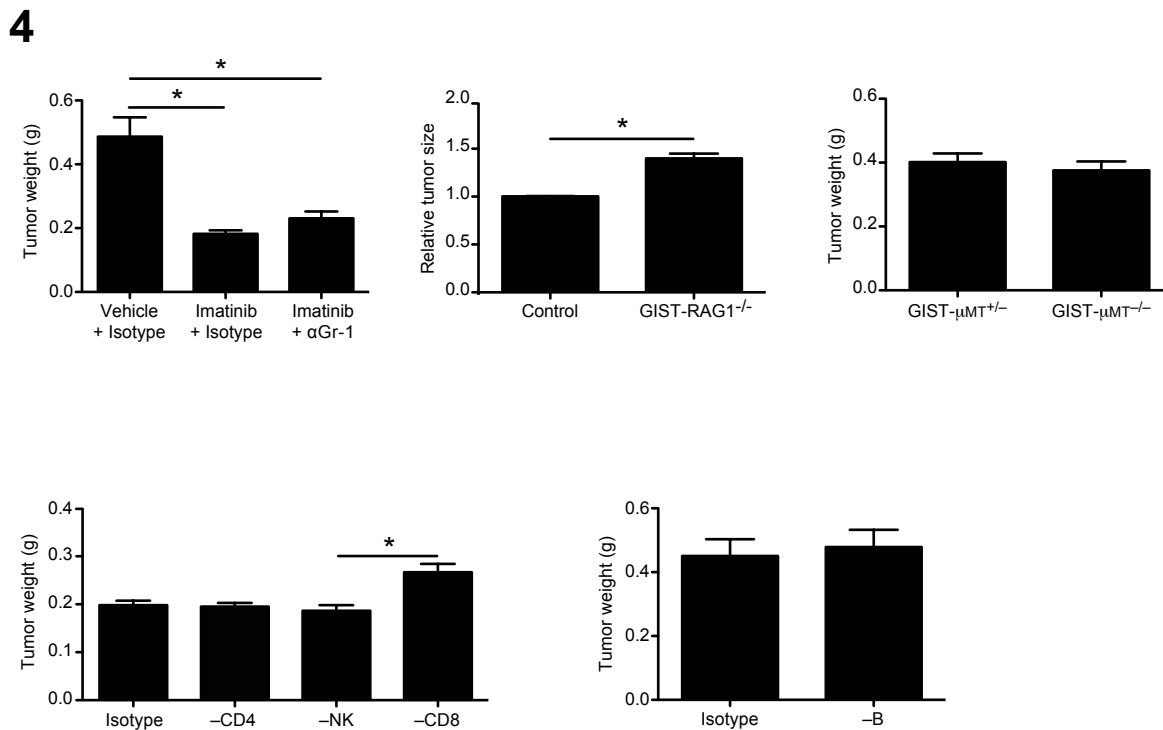

Tumor weight in GIST mice treated with vehicle or imatinib for one week with concurrent depletion of myeloid cells using Gr-1-specific antibody is shown (top left panel, *n* = 10–13 per group). Tumors were measured in GIST-RAG1<sup>-/-</sup> mice by either MRI (*n* = 2) or tumor weight (*n* = 2) and compared to tumors measured by the same modality in 4 age-matched controls per each GIST-RAG1<sup>-/-</sup> mouse (*n* = 16, top middle panel). The significance testing of the ratios was performed using a one-sample t-test after a logarithmic transformation. Tumor weight is shown in GIST-μMT<sup>-/-</sup> mice that are devoid of B cells compared to age-matched littermate controls (*n* = 22–27 per group, top right panel). 4 week old GIST mice were depleted of CD4<sup>+</sup>, NK1.1<sup>+</sup>, or CD8<sup>+</sup> T cells (bottom left) or B cells (bottom right) and tumor weights were analyzed 4 weeks later. Data represent means ± s.e.m. with *n* = 7–9 per group. \* *P* < 0.05.

# 5

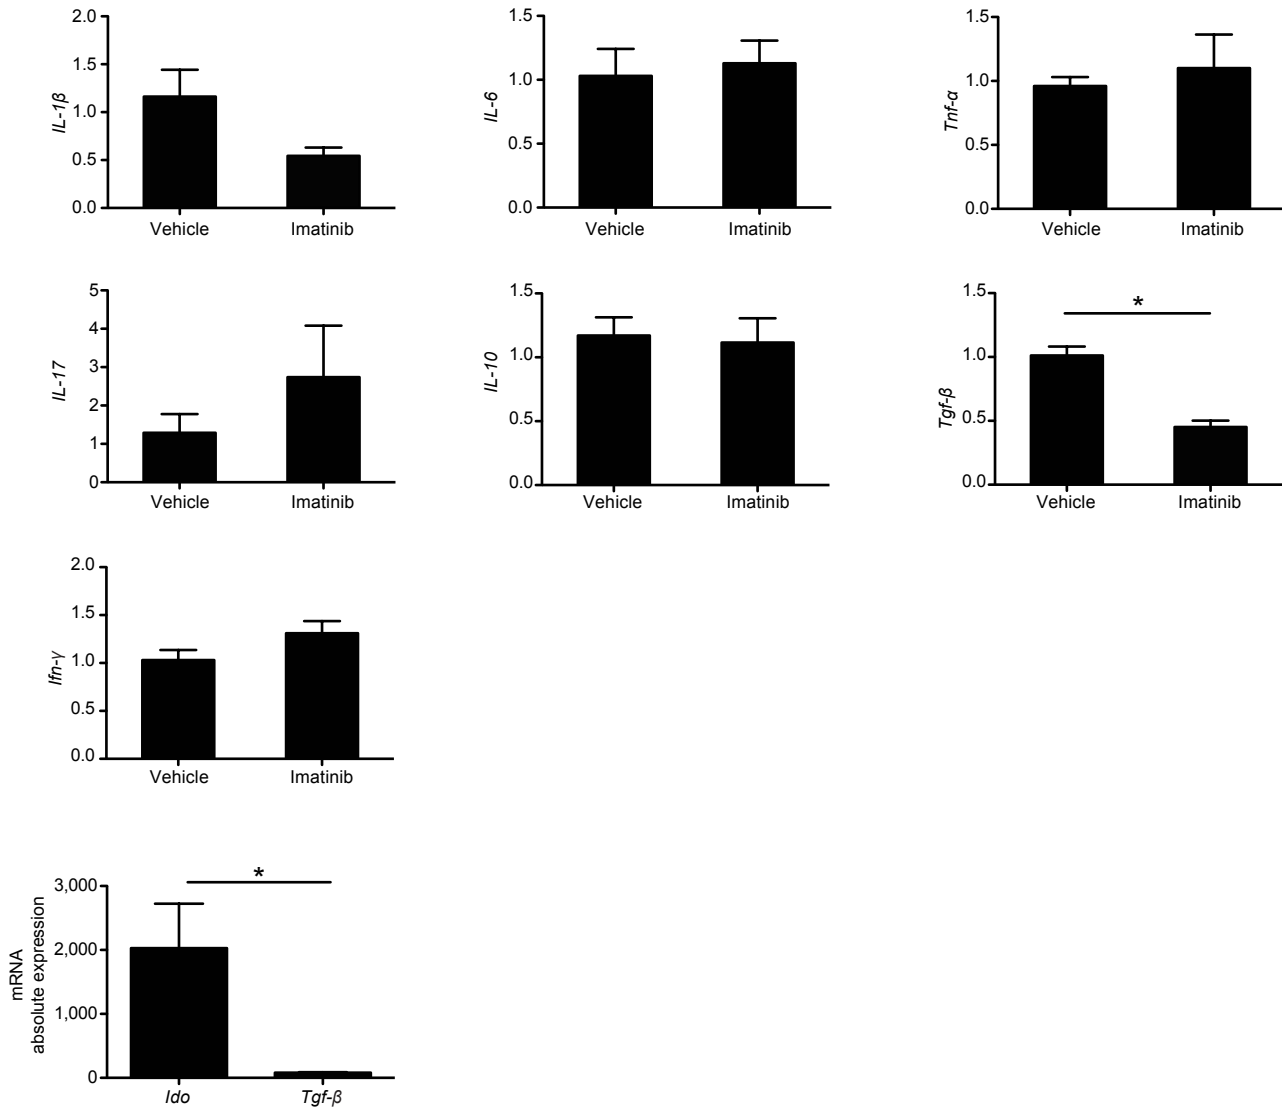

RT-PCR of the indicated cytokines in murine GIST tumors after 7 days of treatment with vehicle or imatinib is indicated relative to internal controls (top panels,  $n = 6$  per group). *Ido* and *Tgf- $\beta$*  mRNA expression relative to internal controls in GIST tumors as determined by microarray analysis (bottom panel,  $n = 3$  per group). Data represent means  $\pm$  s.e.m. \*  $P < 0.05$ .

# 6

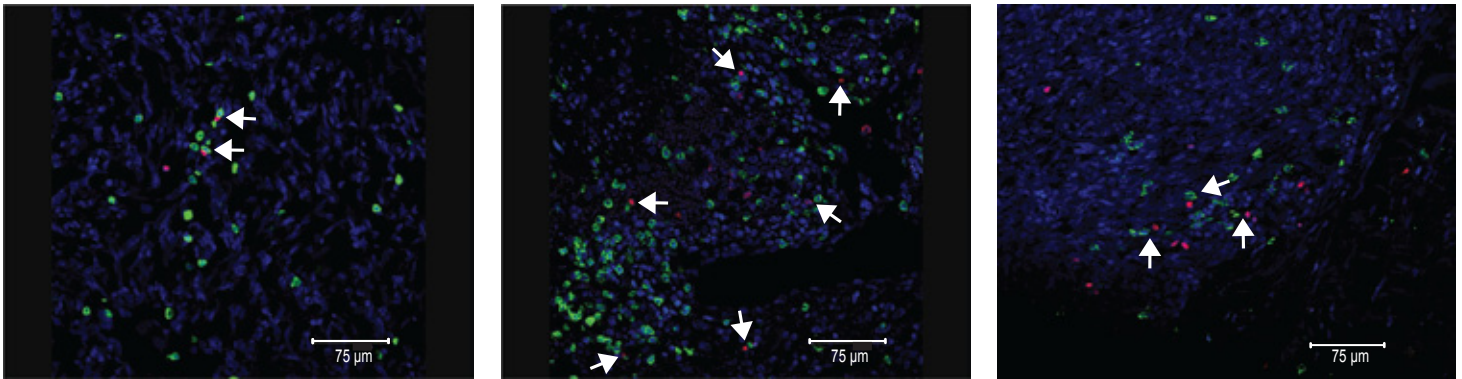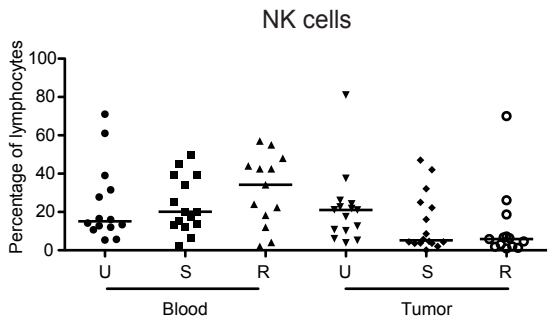

Immunofluorescence demonstrating CD8 (green), FoxP3 (red), and DAPI (blue) staining in human GIST tumors (top panel). Representative staining of 15 specimens analyzed. White arrows indicate co-localization of CD8<sup>+</sup> and FoxP3<sup>+</sup> cells. Flow cytometric analysis of NK cells in untreated (U), sensitive (S), and resistant (R) GIST specimens (bottom panel).

# 7

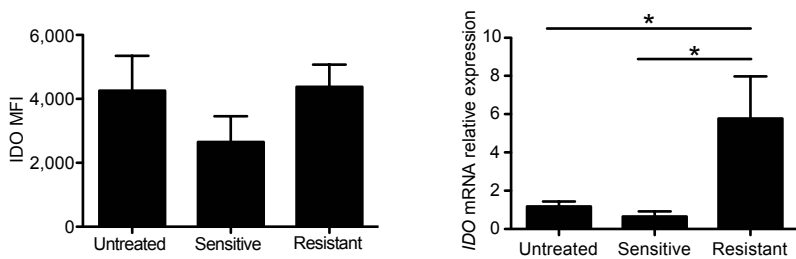

Flow cytometric analysis of IDO expression on tumors cells in untreated, sensitive, and resistant GIST specimens (left panel,  $n = 3-6$  per group);  $P = 0.17$ , two-tailed student t-test. *IDO* mRNA in untreated, sensitive, and resistant human GIST specimens (right panel,  $n = 7-9$  per group). Data represent means  $\pm$  s.e.m. with  $n$  as indicated. \*  $P < 0.05$ .

# 8

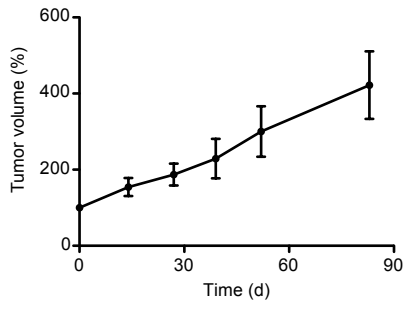

GIST mice were injected with vehicle for one week and serially imaged using MRI.  $n = 8$ .

**SUPPLEMENTARY TABLE 1**

Intratumoral mRNA expression after 1 week of vehicle or imatinib therapy. There were 3 mice per group that were analyzed individually. Only genes with a fold change of at least 2 are listed.

Note that the gene symbol for *Ido* is Indo.

| <b>Gene Symbol</b> | <b>p-value</b> | <b>Fold-Change</b> | <b>Mean Expression Vehicle</b> | <b>Mean Expression Imatinib</b> |
|--------------------|----------------|--------------------|--------------------------------|---------------------------------|
| Cxcl9              | 1.4E-04        | -20.0              | 13,315                         | 964                             |
| Cxcl10             | 7.2E-05        | -16.5              | 4,312                          | 380                             |
| 1700001L23Rik      | 2.4E-08        | -13.6              | 916                            | 69                              |
| U46068             | 2.4E-06        | -11.0              | 250                            | 605                             |
| <b>Indo</b>        | 1.7E-04        | -6.7               | 2,028                          | 306                             |
| Ngfr               | 1.9E-07        | -6.5               | 672                            | 102                             |
| <b>Etv4</b>        | 2.7E-05        | -5.8               | 477                            | 88                              |
| Htr5b              | 5.6E-05        | -5.8               | 341                            | 53                              |
| Colec11            | 7.5E-06        | -5.3               | 633                            | 124                             |
| Scyb11             | 8.1E-05        | -4.8               | 44                             | 33                              |
| LOC194292          | 5.1E-06        | -4.7               | 1,161                          | 626                             |
| Thrsp              | 8.8E-06        | -4.4               | 232                            | 100                             |
| Slc2a6             | 6.8E-06        | -4.2               | 859                            | 349                             |
| B430320C24Rik      | 2.2E-04        | -4.1               | 2,419                          | 639                             |
| Gpbar1             | 5.4E-05        | -4.1               | 268                            | 63                              |
| Pbk                | 6.4E-05        | -4.1               | 1,226                          | 291                             |
| LOC386475          | 8.2E-06        | -3.9               | 159                            | 78                              |
| Olfm4              | 1.3E-06        | -3.9               | 189                            | 49                              |
| Fetub              | 2.7E-04        | -3.9               | 839                            | 221                             |
| A430056A10Rik      | 1.6E-05        | -3.9               | 1,167                          | 320                             |
| Npr3               | 8.8E-05        | -3.8               | 563                            | 156                             |
| D14Ertd668e        | 2.4E-04        | -3.6               | 2,016                          | 608                             |
| Serpina3g          | 4.8E-05        | -3.5               | 311                            | 73                              |
| Ckap2              | 1.2E-06        | -3.4               | 179                            | 52                              |
| Slc16a4            | 1.7E-05        | -3.4               | 133                            | 78                              |
| 1700016C15Rik      | 3.8E-05        | -3.2               | 287                            | 88                              |
| A930031L14Rik      | 6.4E-06        | -3.1               | 175                            | 56                              |
| Pcolce             | 2.8E-04        | -3.1               | 2,373                          | 760                             |
| 2310016F22Rik      | 1.2E-04        | -3.1               | 610                            | 206                             |
| Pcdh12             | 2.3E-05        | -3.1               | 256                            | 83                              |
| LOC380706          | 1.4E-04        | -3.1               | 1,054                          | 361                             |
| Pde4c              | 1.2E-04        | -3.0               | 160                            | 54                              |
| Lgals9             | 9.8E-05        | -3.0               | 105                            | 62                              |
| Mx1                | 4.4E-05        | -3.0               | 190                            | 65                              |
| 6030405A18         | 1.1E-05        | -2.9               | 128                            | 43                              |
| Irf7               | 3.9E-04        | -2.9               | 1,741                          | 617                             |

|               |         |      |       |       |
|---------------|---------|------|-------|-------|
| Prc1          | 2.5E-04 | -2.9 | 1,013 | 344   |
| 9130019I15Rik | 3.7E-05 | -2.9 | 968   | 355   |
| Hpcal4        | 2.7E-08 | -2.9 | 260   | 92    |
| H2-T22        | 1.9E-04 | -2.8 | 1,008 | 363   |
| D11Lgp2e      | 1.8E-06 | -2.8 | 634   | 229   |
| LOC219228     | 2.4E-05 | -2.8 | 100   | 230   |
| Tnfrsf21      | 8.4E-06 | -2.8 | 67    | 214   |
| Pacrg         | 1.4E-05 | -2.7 | 159   | 58    |
| Cd40          | 6.9E-06 | -2.7 | 868   | 320   |
| 2610318C08Rik | 6.5E-05 | -2.7 | 342   | 124   |
| Dlm1-pending  | 1.9E-05 | -2.7 | 129   | 49    |
| Ifi204        | 4.6E-05 | -2.7 | 246   | 93    |
| LOC384158     | 6.3E-05 | -2.7 | 158   | 420   |
| Bok           | 9.8E-05 | -2.7 | 1,371 | 518   |
| Olf550        | 2.3E-05 | -2.6 | 261   | 100   |
| 2510004L01Rik | 4.0E-04 | -2.6 | 1,945 | 773   |
| Lgals3bp      | 2.0E-04 | -2.6 | 399   | 172   |
| 1110030C22Rik | 3.5E-04 | -2.5 | 213   | 84    |
| Ly6e          | 4.3E-05 | -2.5 | 9,734 | 3,893 |
| Tpx2          | 2.9E-04 | -2.5 | 993   | 577   |
| Gatm          | 7.1E-05 | -2.5 | 237   | 97    |
| Slc15a3       | 5.8E-05 | -2.5 | 96    | 48    |
| D930046M13Rik | 3.5E-05 | -2.5 | 227   | 91    |
| Cenpa         | 1.6E-04 | -2.5 | 2,089 | 841   |
| Ccnb1         | 1.9E-04 | -2.5 | 497   | 201   |
| Pcdh17        | 7.4E-05 | -2.4 | 5,713 | 2,342 |
| 6030405A18Rik | 1.9E-04 | -2.4 | 94    | 39    |
| Gm885         | 1.1E-04 | -2.4 | 382   | 160   |
| LOC432555     | 1.1E-04 | -2.4 | 151   | 78    |
| Crim1         | 2.8E-04 | -2.4 | 832   | 351   |
| E030034P13Rik | 2.2E-05 | -2.4 | 410   | 172   |
| Calmbp1       | 2.5E-04 | -2.4 | 352   | 146   |
| 1190002F15Rik | 3.6E-05 | -2.3 | 272   | 115   |
| Tapbp         | 1.1E-04 | -2.3 | 52    | 77    |
| 1200008O12Rik | 1.3E-04 | -2.3 | 319   | 137   |
| H2-T9         | 8.7E-05 | -2.3 | 7,120 | 3,161 |
| Hspa12a       | 2.9E-04 | -2.3 | 325   | 142   |
| AI505034      | 2.8E-04 | -2.2 | 83    | 144   |
| C1s           | 3.0E-04 | -2.2 | 242   | 113   |
| Ntrk2         | 3.3E-04 | -2.2 | 158   | 70    |
| Rerg          | 4.1E-04 | -2.2 | 1,800 | 813   |
| 1200009O22Rik | 3.6E-04 | -2.2 | 1,768 | 833   |
| Gdf15         | 2.6E-04 | -2.2 | 135   | 61    |
| H2-T10        | 3.8E-04 | -2.1 | 2,304 | 1,100 |
| Cdc2a         | 1.7E-04 | -2.1 | 237   | 110   |
| Tlr3          | 2.1E-04 | -2.1 | 89    | 69    |
| G431001E03Rik | 2.1E-05 | -2.1 | 655   | 311   |
| LOC380732     | 2.5E-04 | -2.1 | 241   | 50    |
| KIF23         | 1.7E-04 | -2.1 | 62    | 98    |

|               |         |      |        |        |
|---------------|---------|------|--------|--------|
| Sln           | 5.8E-05 | -2.1 | 2,436  | 582    |
| 6720460F02Rik | 2.7E-04 | -2.1 | 94     | 45     |
| LOC381319     | 9.1E-05 | -2.1 | 2,234  | 768    |
| Ly6a          | 2.8E-04 | -2.1 | 20,943 | 10,365 |
| Grp           | 3.5E-05 | -2.1 | 169    | 82     |
| Mest          | 3.3E-05 | -2.1 | 202    | 97     |
| Pak3          | 2.0E-04 | -2.1 | 158    | 76     |
| Dcbld2        | 2.3E-04 | -2.0 | 197    | 97     |
| 4921511I23Rik | 1.1E-04 | -2.0 | 101    | 49     |
| H2-D4         | 3.5E-04 | -2.0 | 179    | 89     |
| Tnfsf10       | 2.0E-04 | -2.0 | 112    | 65     |
| A630038D02    | 1.1E-04 | -2.0 | 309    | 154    |
| D030038A19Rik | 2.9E-04 | -2.0 | 120    | 61     |
| Sh3md4        | 2.5E-04 | -2.0 | 4,947  | 1,424  |
| 4732435N03Rik | 1.8E-04 | 2.0  | 66     | 132    |
| Syt1          | 1.8E-04 | 2.0  | 149    | 264    |
| Gng13         | 2.3E-04 | 2.0  | 63     | 128    |
| Sox10         | 3.6E-05 | 2.1  | 143    | 314    |
| Ctsf          | 4.9E-06 | 2.1  | 126    | 263    |
| Plekhb1       | 3.7E-04 | 2.1  | 227    | 494    |
| Gm1012        | 5.1E-06 | 2.2  | 78     | 168    |
| Stmn2         | 2.8E-04 | 2.2  | 42     | 64     |
| Sncg          | 1.3E-04 | 2.2  | 139    | 249    |
| Cd79a         | 3.2E-04 | 2.2  | 63     | 140    |
| E130013N09Rik | 3.4E-04 | 2.2  | 108    | 239    |
| 8430408G22Rik | 9.6E-05 | 2.3  | 99     | 225    |
| Ldb2          | 2.6E-05 | 2.3  | 245    | 61     |
| Edn1          | 1.6E-04 | 2.3  | 190    | 449    |
| Tsrc1         | 1.6E-04 | 2.4  | 433    | 170    |
| Pdgfra        | 1.9E-04 | 2.4  | 305    | 713    |
| Ccl20         | 1.3E-04 | 2.5  | 74     | 188    |
| Cxcl5         | 3.4E-04 | 2.5  | 48     | 120    |
| Col23a1       | 1.4E-04 | 2.6  | 148    | 382    |
| LOC381283     | 9.1E-05 | 2.6  | 122    | 77     |
| Pou2af1       | 3.4E-04 | 2.6  | 118    | 300    |
| Per1          | 3.1E-04 | 2.7  | 267    | 713    |
| BC018285      | 2.1E-04 | 2.7  | 797    | 2,069  |
| Chst8         | 4.6E-05 | 2.8  | 87     | 235    |
| Aqp1          | 2.3E-04 | 2.8  | 855    | 1,294  |
| Mt2           | 1.0E-04 | 3.0  | 134    | 394    |
| Cldn5         | 2.7E-05 | 3.0  | 91     | 265    |
| Apod          | 2.4E-04 | 3.0  | 130    | 86     |
| Hsd11b2       | 3.7E-04 | 3.2  | 134    | 439    |
| Tnfrsf13c     | 3.3E-06 | 3.2  | 172    | 116    |
| Ppp1r3c       | 9.5E-05 | 3.6  | 274    | 995    |
| Cdkn1c        | 6.4E-07 | 3.8  | 483    | 1,807  |
| Plf2          | 1.8E-04 | 4.1  | 36     | 162    |
| Cyp2d9        | 3.9E-07 | 4.9  | 90     | 438    |



## SUPPLEMENTARY TABLE 2

Clinicopathologic characteristics of 45 specimens in 36 patients.

|                           | Untreated                   | Sensitive      | Resistant       |
|---------------------------|-----------------------------|----------------|-----------------|
| Number of patients        | 15                          | 13             | 11 <sup>a</sup> |
| Number of specimens       | 15                          | 17             | 13              |
| Median age (range)        | 68 (41–87)                  | 56 (46–73)     | 58 (29–75)      |
| Female                    | 6                           | 2              | 3               |
| Male                      | 9                           | 11             | 8               |
| Primary                   | 14                          | 8              | 3               |
| Metastatic                | 1                           | 9              | 10              |
| Primary location          |                             |                |                 |
| Stomach                   | 14                          | 2              | 5               |
| Small intestine           | 1                           | 11             | 5               |
| Other                     | 0                           | 0              | 1               |
| Tyrosine kinase inhibitor |                             |                |                 |
| Imatinib                  | Not applicable <sup>b</sup> | 13             | 11              |
| Sunitinib                 |                             | 2 <sup>c</sup> | 3 <sup>c</sup>  |
| Dasatanib                 |                             | 0              | 1 <sup>c</sup>  |
| Sorafenib                 |                             | 1 <sup>c</sup> | 1 <sup>c</sup>  |
| Mutational status         |                             |                |                 |
| <i>KIT</i> Exon 9         | 0                           | 5              | 2               |
| <i>KIT</i> Exon 11        | 6                           | 6              | 8 <sup>d</sup>  |
| <i>PDGFRA</i>             | 3                           | 1              | 3 <sup>e</sup>  |
| WT                        | 1                           | 1              | 0               |
| Unavailable tissue        | 5                           | 4              | 0               |
| Median treatment (yrs)    | Not applicable <sup>b</sup> | 0.7 (0.4–3)    | 2 (0.6–8.9)     |

<sup>a</sup>3 patients also had sensitive tumors.

<sup>b</sup>1 patient was immediately intolerant to imatinib and sunitinib when treated several years earlier.

<sup>c</sup>Previously failed imatinib.

<sup>d</sup>4 tumors also had secondary mutations in *KIT* exon 13 (V654A) or *KIT* exon 17 (D820H in 2 patients and D820V in 1 patient).

<sup>e</sup>1 patient had a D842V mutation.

## SUPPLEMENTARY METHODS

**Animals and treatment.** Mice were sacrificed at the indicated time points and organs were removed. After weighing the tumors, we mechanically dissociated tumors and DLNs using the flat portion of a plunger from a 3-ml syringe. We then passed the cell suspension through a sterile 100- $\mu\text{m}$  strainer (Falcon; BD Biosciences) followed by an additional 40- $\mu\text{m}$  strainer (Falcon; BD Biosciences) prior to flow cytometric analysis. Depletion of myeloid cells was achieved by i.p. injection of 500  $\mu\text{g}$  Gr-1-specific antibody (clone RB6-8C5, Monoclonal Antibody Core Facility, Sloan-Kettering Institute) on days 0, 1, 4, and 6 of imatinib treatment. Long term B cell depletion was achieved by i.v. injections of 250  $\mu\text{g}$  of CD20-specific antibody (clone 18B12, Biogen Idec) every 2 weeks.

**Antibodies.** Mouse-specific antibodies to CD8 (clone 53-6.7, AF700), CD4 (clone GK 1.5, APC-Cy7), FoxP3 (clone FJK-16S, APC), granzyme B (clone 16G6, FITC), CD25 (clone PC 61.5, PerCP-Cy5.5), NK1.1 (clone PK136, FITC), and IL-17 (clone eBio17B7, APC) were purchased from eBioscience. Antibodies to Ki67 (clone B56, FITC), CD3 (clone 145-2C11, PerCP-Cy5.5), CD69 (clone H1.2F3, PE), KIT (clone 2B8, APC), Annexin V FITC, IFN- $\gamma$  (clone XMG1.2, FITC), and IL-4 (clone BVD4-1D11, PE) were obtained from BD Biosciences. Human-specific antibodies included CD3 (clone HIT3a, PE), CD4 (clone RPA-T4, AF700), CD25 (clone M-A251, APC), and CD69 (clone FN50, APC-Cy7) from BD Biosciences and CD8 (clone RPA-T8, PerCP-Cy5.5) from eBioscience. Intracellular cytokine analysis was performed after stimulating tumor infiltrating lymphocytes for 4 h in vitro with 50  $\text{ng ml}^{-1}$  phorbol 12-myristate 13-acetate and 500  $\text{ng ml}^{-1}$  ionomycin in the presence of Brefeldin A (1  $\mu\text{L}$  per  $10^6$  cells, BD Biosciences). After restimulation, tumor infiltrating lymphocytes were stained for intracellular cytokines using BD Cytofix/Cytoperm kit according to manufacturer's instructions (BD Biosciences). Antibodies to KIT, STAT3, and S6 were purchased from Cell Signaling. The antibody to ETV4 was purchased

from Santa Cruz Biotechnology. IDO was detected with flow cytometry and western blot using mouse/human-specific IDO (clone 10.1, Millipore). Rat mouse-specific IgG FITC (eBioscience) was used as a secondary antibody for flow cytometry and HRP-conjugated goat antibody specific to mouse IgG for WB (Santa Cruz). IDO staining was classified as hi or low based on the median IDO MFI of the 13 patient sample set. Mouse/human-specific GAPDH (clone 14C10) was purchased from Cell Signaling. Human intracellular FoxP3 expression was assessed using the FITC anti-human FoxP3 Staining Kit (eBioscience). All other intracellular staining was performed using the FoxP3 fixation/permeabilization buffer (eBioscience) according to the manufacturer's instructions.

***Immunohistochemistry.*** Mouse tumors were excised and immediately fixed in 10% formalin, embedded in paraffin, and cut to 5  $\mu\text{m}$  thickness. Hematoxylin and eosin and CD8-specific (Dako) staining was performed using standard methods. Slides were assessed on an Axioplan 2 wide-field microscope (Zeiss).

***Immunofluorescence.*** The indirect, double sequential immunofluorescence detection of CD8 and FoxP3 was performed using Discovery XT processor (Ventana Medical Systems). The tissue sections were blocked for 30 min in mouse IgG blocking reagent (Vector Labs), followed by incubation for 4 h with 5  $\mu\text{g ml}^{-1}$  of the primary antibody (monoclonal mouse antibody specific for human CD8 - Dako clone C8/144B or monoclonal mouse antibody specific for human FoxP3 - Abcam clone 236A/E7) followed by incubation for 60 min with biotinylated mouse-specific IgG reagent (Vector Labs, 1:250 dilution). For detection of CD8 or FoxP3, the tyramide signal amplification kit was used according to the manufacturer's specifications (Alexa Fluor 488 or Alexa Fluor 568, respectively; Invitrogen).

**Microarray.** We harvested organs from GIST mice and isolated total RNA using Trizol. Quality of RNA was ensured before labeling by analyzing 20–50 ng of each sample using the RNA 6,000 NanoAssay and a Bioanalyzer 2,100 (Agilent). Samples with a 28S/18S ribosomal peak ratio of 1.8–2.0 were considered suitable for labeling. For samples meeting this standard, 200 ng of total RNA were labeled using the Illumina TotalPrep RNA Amplification kit (Ambion), according to manufacturer's instructions. 3 µg of labeled and fragmented cRNA were then hybridized to the mouse-ref8 array (Illumina), which interrogates ~22,000 transcripts of known genes. Statistical analysis was performed in Partek Genomics Suite version 6.5. Data were log transformed and quantile normalized. ANOVA was performed for the respective comparison groups. Statistically significant genes had a False Discovery Cutoff Rate of 0.05. Genes were further filtered based on fold change of greater or less than 2. The Gene Expression Omnibus accession number for these data is GSE30416.

**Western Blotting and Immunoprecipitation.** Whole protein was extracted from frozen GIST tissues or from T1 cells using lysis buffer and complete protease inhibitor cocktail (Roche Diagnostics). Protein concentration was determined using the Bradford method. Western blotting was performed using standard methods. For IDO immunoprecipitation in T1 cells, equal amount of cell lysates (150 µg) were incubated with 1 µg of mouse antibody specific to human IDO or control IgG and protein A/G agarose beads for overnight at 4 °C. The supernatants were discarded. Beads were washed with lysis buffer and subjected to SDS-PAGE. The gels were transferred to nitrocellulose and blotted using human-specific IDO IgG (Millipore).

**Chromatin Immunoprecipitation (ChIP).** ChIP was performed using the ChIP-IT kit (Active Motif, USA) according to the manufacturer's protocol. Briefly, 100 mg GIST tissue was cut into small pieces and cross-linked with 1% formaldehyde in PBS for 15 min at room temperature. Cross-linking was stopped by addition of 0.125 M glycine for 5 min at room temperature. The

tissue was briefly washed with cold PBS and the tissue pieces were minced using a tissue disintegrator for at least 3 min. The homogenized cell suspension was centrifuged at 2,500 rpm at 4 °C for 10 min. The cells were lysed in 1X lysis buffer provided by the manufacturer. The nuclear pellet was obtained by centrifuging the lysed cells at 5,000 rpm for 10 min at 4 °C. Sonication was performed for 15 pulses, with each pulse consisting of 30 s shearing and 20 s placement in ice. The sonicated DNA was checked for sonication efficiency (200–1,500 bp) by running the chromatin on an agarose gel. The chromatin was initially pre-cleared using protein-G beads and subsequently treated with 3 µg Etv4-specific antibody for immunoprecipitation overnight. The immunoprecipitated ChIP product was washed, reverse cross-linked, treated with proteinase K, and eluted to get ChIP-enriched DNA. Simultaneously, control IgG was used as a negative control to check the efficiency of the ChIP experiment. One-tenth of the total lysates was used for total genomic DNA as “input DNA” control. 50 ng of ChIP enriched DNA was used to perform PCR for the *Ido* promoter using the following primers: forward primer (5'-CCAGGATATGTGTTGTTTCGTGT-3'), reverse primer (5'-AAAGAGGGGGAGATTCCACC-3'). The PCR products were run on a 2% agarose gel and the amplicons were visualized using UV light.
